# Supplementary material for: A Novel Diagnostic Test to Screen SARS-CoV-2 Variants Containing E484K and N501Y Mutations
Source: bioRxiv or medRxiv preprint supplement (doi:10.1101/2021.03.26.21253712), 2021-03-29
Supplement: Supplementary file [file media-1.pdf]

1 **SUPPLEMENTAL MATERIAL**

2

3 **A Novel Diagnostic Test to Screen SARS-CoV-2 Variants Containing E484K and N501Y**  
4 **Mutations**

5 Yanan Zhao<sup>1,2#</sup>, Annie Lee<sup>1</sup>, Kaelea Composto<sup>1</sup>, Marcus H. Cunningham<sup>1</sup>, Jose R. Mediavilla<sup>1</sup>,  
6 Samantha Fennessey<sup>3</sup>, André Corvelo<sup>3</sup>, Kar Fai Chow<sup>4</sup>, Michael Zody<sup>3</sup>, Liang Chen<sup>1,2</sup>, Barry N.  
7 Kreiswirth<sup>1,2,5</sup>, David S. Perlin<sup>1,2,5#</sup>

8

9 <sup>1</sup>Center for Discovery and Innovation, Hackensack Meridian Health, Nutley, NJ 07110, USA

10 <sup>2</sup>Hackensack Meridian School of Medicine, Nutley, NJ 07110, USA

11 <sup>3</sup>New York Genomic Center, NY 10013, USA

12 <sup>4</sup>Core Laboratory, Department of Pathology, Hackensack University Medical Center,  
13 Hackensack, NJ 07110, USA

14 <sup>5</sup>Georgetown University Lombardi Comprehensive Cancer Center, Washington, DC 20057, USA

15

16

17

18 # Address correspondence to Yanan Zhao, Ph.D. [yanan.zhao@hnh-cdi.org](mailto:yanan.zhao@hnh-cdi.org), phone: 201-880-

19 3503, or David S. Perlin, Ph.D. [david.perlin@hnh-cdi.org](mailto:david.perlin@hnh-cdi.org), phone: 201-880-3500

20 **Viral culture and RNA extraction.** Viral culture stocks of SARS-CoV-2 USA WA1/2020 (WT),  
21 SARS-CoV-2 hCoV-19/USA/CA\_CDC\_5574/2020 (B.1.1.7), SARS-CoV-2 hCoV-  
22 19/England/204820464/2020 (B.1.1.7), SARS-CoV-2 hCoV-19/South Africa/KRISP-EC-  
23 K005321/2020 (B.1.351), and SARS-CoV-2 hCoV-19/South Africa/KRISP-K005325/2020  
24 (B.1.351) were obtained from BEI Resources, NIAID (Manassas, VA). One mutant carrying  
25 E4848K but not N501Y was recently isolated and obtained from a HMH network hospital. All  
26 strains were propagated on VeroE6/TMPRSS2 cell line (SEKISUI XenoTech, KS) in a Biosafety  
27 level (BSL) 3 laboratory. Supernatant of the viral culture was proteinase K treated (200 µg/ml)  
28 and heat inactivated at 95°C for 10 min prior to RNA isolation in the BSL-2 laboratory using  
29 QIAamp viral RNA mini kit (Qiagen, MD).

30  
31 **Asymmetric RT-PCR and Melting curve analysis.** One set of primers were designed to  
32 amplify a 148-nt region of the SARS-CoV-2 genomic RNA covering E484 and N501 of the spike  
33 protein. Two differentially labeled molecular beacons, 484WT-MB (FAM-labeled) and 501WT-  
34 MB (Quasar670-labeled), were designed to contain the WT sequences of E484 and N501,  
35 respectively. Asymmetric RT-PCR was carried out on the Mic Real Time PCR Cycler (Bio  
36 Molecular Systems, software micPCRv2.8.13) in a 20 µl reaction volume using the One Step  
37 PrimeScript™ RT-PCR Kit (Perfect Real Time) (Takara). This duplex assay contained 10 µl of  
38 one step RT-PCR Buffer III, 0.4 µl of PrimeScript RT enzyme Mix II, 0.4 µl of TaKaRa Ex Taq  
39 HS (5U/µl), 40 nM of S484F, 1 µM of S501R (10 µM), 100 µM of both 484WT-MB and 501WT-  
40 MB, and 5 µl of RNA or heat-inactivated template. Thermal cycling profile was 42°C for 5 min for  
41 reverse transcription, followed by 95°C for 10 sec then 50 cycles of 95°C for 5 sec and 60°C for  
42 20 sec. Immediately after amplification, melting curve analysis was initiated as a minute  
43 incubation at 95°C, after which it was melted from 47.5°C to 58.5°C with a ramp rate of 0.1°C/s  
44 for the 484WT-MB and melted from 53°C to 63°C with a ramp rate of 0.1°C/s for the 501WT  
45 probe.

46

47 **Viral genome sequencing and analysis.** Viral RNA from swabs was extracted using QIAcube  
48 Connect (Qiagen), following the manufacturer's instructions. SARS-CoV-2 targeted assay  
49 libraries were prepared using the QIAseq SARS-CoV-2 Primer Panel and cDNA Synthesis for  
50 Illumina kits (Illumina). Adapter sequences and low quality ( $Q < 20$ ) bases were trimmed from  
51 the raw reads, using Cutadapt v2.101 (<https://github.com/marcelm/cutadapt/>). Processed reads  
52 were then mapped to the SARS-CoV-2 genome reference using BWA-MEM v0.7.172 [1] and  
53 genome sequences were determined by Samtools v1.11 and bcftools v1.11 [2]. The genome  
54 clades and lineages were determined by Nextclade server (<https://clades.nextstrain.org/>) and  
55 Pangolin v2.3.0 (<https://github.com/cov-lineages/pangolin>), respectively. Genomes were aligned  
56 using nextalign v0.2.0 (<https://github.com/nextstrain/nextclade/releases>), and a maximum  
57 likelihood phylogenetic tree was constructed using IQ-TREE v2.1.2 [3] with automatic model  
58 selection and 1000-bootstrap replicates. The tree was annotated using iTOL v6.0 [4].

59

60 **Clinical screening.** Clinical samples included in this study were de-identified nasopharyngeal  
61 swabs obtained from 8 different sites within HMH network and banked in the biorepository of our  
62 center. All samples were collected in standard viral transport media and stored at  $-80^{\circ}\text{C}$  upon  
63 receipt. An extraction-free method [5] was used to process samples prior to genotyping  
64 analysis. Briefly, a 50  $\mu\text{l}$  of aliquot was taken from each swab and mixed with 6.5  $\mu\text{l}$  of  
65 proteinase K (20 mg/ml, Roche), followed by heating up the mixture at  $95^{\circ}\text{C}$  for 5 min. Then 5  $\mu\text{l}$   
66 of the processed sample was used directly as template for genotyping assay. Information of  
67 sample source and collection timeline was provided by HMH bio-R working group.

68

69 **Statistical analysis.**  $T_m$  values for E484 and N501 genotype were determined by melting curve  
70 analysis using the Mic Real-Time PCR software (micPCRv2.8.13). The melting curve and  
71 epidemiological distribution of variants were plotted and analyzed in GraphPad Prism version

72 9.0.0. We used  $\chi^2$  test or Fisher's exact test to compare the distribution between different  
73 locations. A *P* value less than 0.05 was considered statistically significant.

74

## 75 **References**

- 76 1. Li H, Durbin R. Fast and accurate long-read alignment with Burrows-Wheeler transform.  
77 Bioinformatics (Oxford, England). 2010 Mar 1;26(5):589-95. doi:  
78 10.1093/bioinformatics/btp698. PubMed PMID: 20080505; PubMed Central PMCID:  
79 PMCPMC2828108. eng.
- 80 2. Li H, Handsaker B, Wysoker A, et al. The Sequence Alignment/Map format and  
81 SAMtools. Bioinformatics (Oxford, England). 2009 Aug 15;25(16):2078-9. doi:  
82 10.1093/bioinformatics/btp352. PubMed PMID: 19505943; PubMed Central PMCID:  
83 PMCPMC2723002. eng.
- 84 3. Nguyen LT, Schmidt HA, von Haeseler A, et al. IQ-TREE: a fast and effective stochastic  
85 algorithm for estimating maximum-likelihood phylogenies. Molecular biology and  
86 evolution. 2015 Jan;32(1):268-74. doi: 10.1093/molbev/msu300. PubMed PMID:  
87 25371430; PubMed Central PMCID: PMCPMC4271533. eng.
- 88 4. Letunic I, Bork P. Interactive Tree Of Life (iTOL) v4: recent updates and new  
89 developments. Nucleic Acids Research. 2019;47(W1):W256-W259. doi:  
90 10.1093/nar/gkz239 %J Nucleic Acids Research.
- 91 5. Vogels CBF, Watkins AE, Harden CA, et al. SalivaDirect: A Simplified and Flexible  
92 Platform to Enhance SARS-CoV-2 Testing Capacity. Med (New York, NY). 2020 Dec 26.  
93 doi: 10.1016/j.medj.2020.12.010. PubMed PMID: 33521748; PubMed Central PMCID:  
94 PMCPMC7836249. eng.

95

96

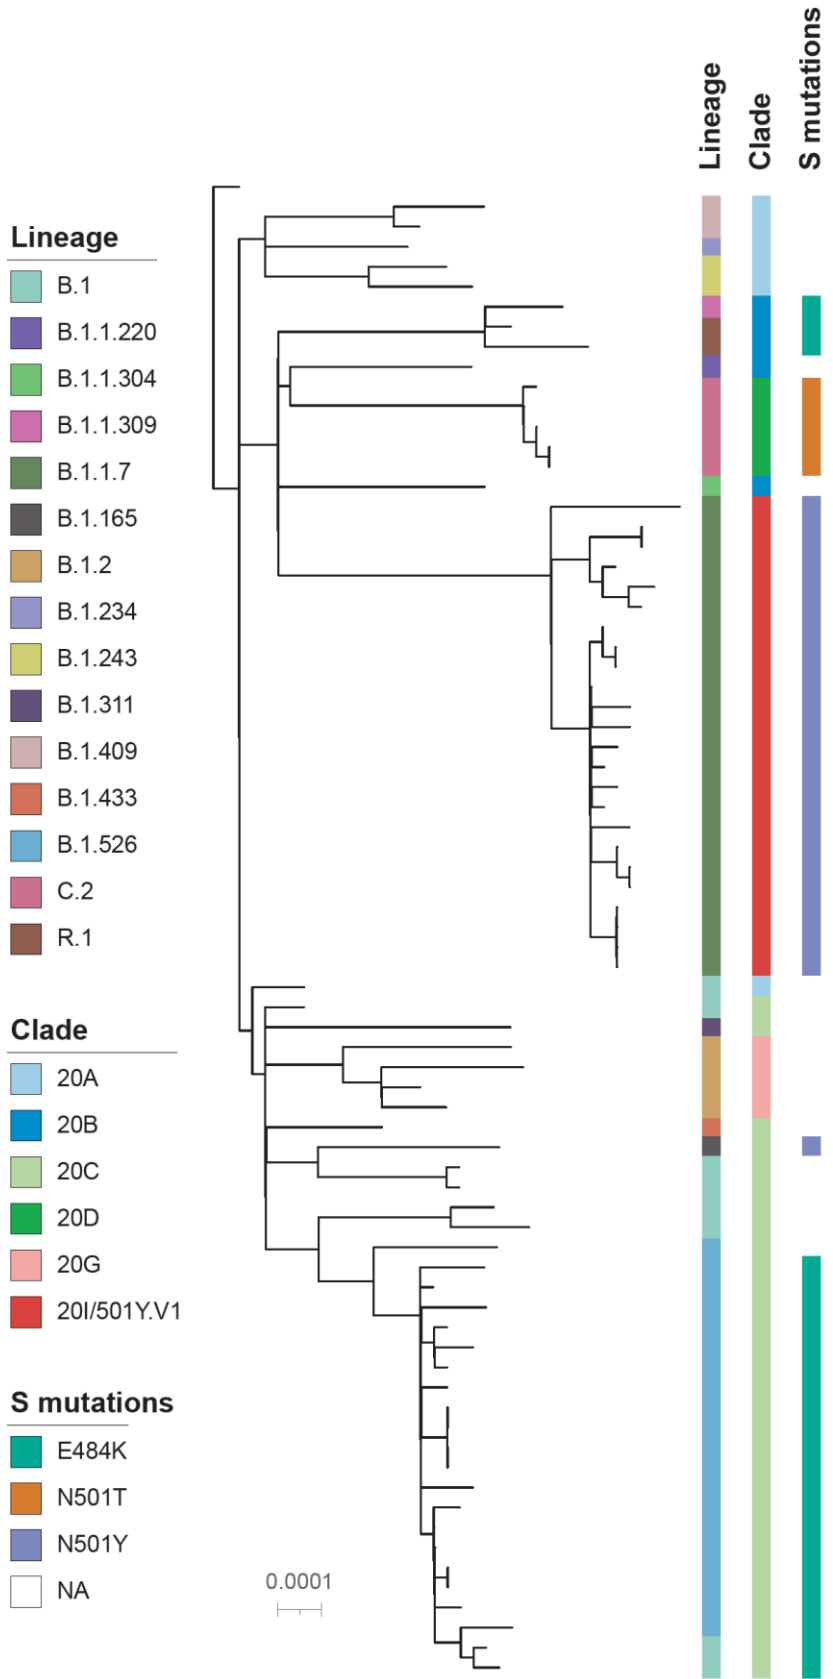

98 **Figure S1.** A maximum-likelihood phylogenetic tree of 74 SARS-CoV-2 genomes from HMH  
99 network. The tree is rooted with the Wuhan/Hu-1 SARS-CoV-2 reference (NC\_045512.2)  
100 sequence and annotated using iTOL ([www.itol.embl.de](http://www.itol.embl.de)). The scale bar represents 0.0001  
101 nucleotide substitutions per site. The SARS-CoV-2 Pangolin lineage, NextStrain clade, S protein  
102 484 and 501 mutations were illustrated by different color bars on the right.
